# Supplementary material for: Probing interaction of a trilysine peptide with DNA underlying formation of guanine–lysine cross-links: insights from molecular dynamics
Source: Royal Society of Chemistry journal article supplement (doi:10.1039/c9cp04708e), 2019-01-01
Supplement: c9cp04708e1.pdf [file c9cp04708e1.pdf]

## Supporting Information for :

# Probing interaction of a trilycine peptide with DNA behind formation of guanine-lysine cross-links: insights from molecular dynamics. †

Chen-Hui Chan<sup>[a]</sup>, Antonio Monari<sup>[b]</sup>, Jean-Luc Ravanat<sup>[c]</sup>, Elise Dumont<sup>[a]\*</sup>

[a] Chen-Hui Chan, Prof. Elise Dumont

Univ Lyon, ENS de Lyon, CNRS UMR 5182, Université Claude Bernard Lyon 1, Laboratoire de Chimie, F-69322, France

[b] Dr Antonio Monari

Université de Lorraine and CNRS, LCPT UMR 7019, Boulevard des Aiguillettes, Vandoeuvre-les-Nancy, 54000 Nancy, France

[c] Dr Jean-Luc Ravanat

Univ. Grenoble Alpes, CEA, CNRS, INAC-SyMMES, 17 rue des martyrs, 38054, Grenoble CEDEX 9, France

E-mail: [elise.dumont@ens-lyon.fr](mailto:elise.dumont@ens-lyon.fr)

Phone: +33 (0)4 72 72 88 46. Fax: +33 (0)4 72 72 88 6

## 1) Protocol for the molecular dynamics simulations

All molecular dynamic simulations and post-processing were performed with the Amber 16 Molecular Dynamics software package. The force-field parameters were taken from parm99. Each system (KKK, TGT and the double-stranded 15-bp) was previously built using the tleap and nucleic acid builder (nab) programs within the Antechamber suite of programs. KKK was left uncapped with  $-\text{NH}_3^+$  and  $-\text{COO}^-$  termini to match the experimental setup by one of us. We stress out that the trilylsine was not arbitrarily added close to guanine, but was placed at a distance of  $\sim 6 \text{ \AA}$  in order to avoid biasing the self-association process.

For the KKK-15bp system, four independent trajectories were run for 200 or 500ns (see Table 1, thus  $1.4 \mu\text{s}$  in total). It is to be noted that Trajectories 1 and 2 were run using a time step of 2fs, where as trajectories 3 and 4 were run using a time step of 4fs taking advantage of the Hydrogen Mass Repartitioning scheme (HMR).

After all dynamic molecular simulations, a cluster analysis was performed using the cpptraj module of AMBER, and thermodynamic parameters were extracted using the MM-GBSA method with internal and external dielectric constants set to 1 and 80, respectively. The salt concentration was set to 0.15 M.

## 2) Cartoon representations for the TGT oligonucleotides and KKK@15-bp system before interactions

### a) KKK-TGT system

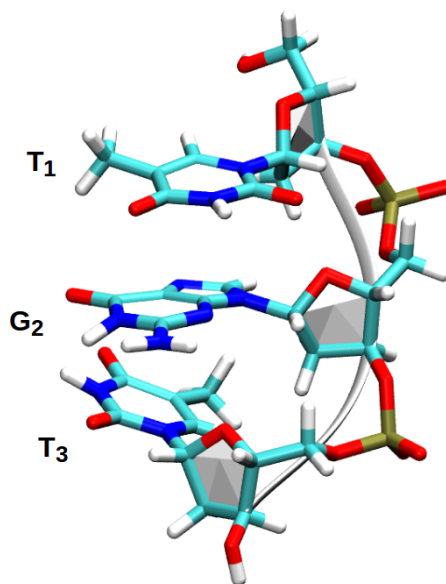

**Figure S1.** Representative structure of isolated TGT trinucleotide after 200ns of simulation. Obtained by cluster analysis. One observes a  $\pi$ -stacking interaction.

b) KKK-15-bp system

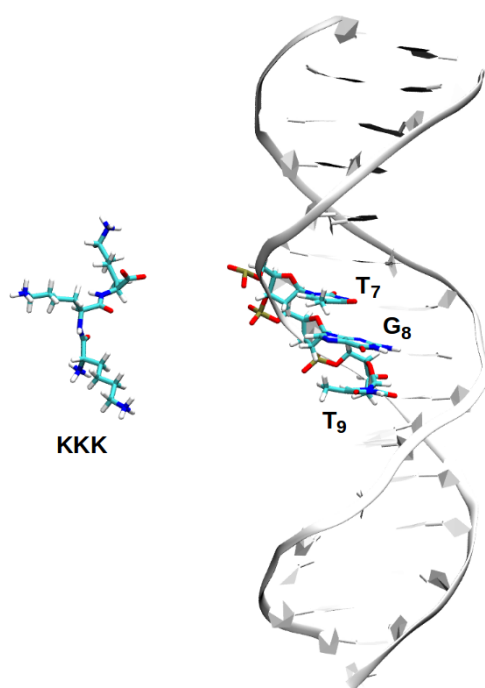

**Figure S2.** Initial configuration of the 15-bp oligonucleotide with the KKK peptide placed near the center of the duplex.
